# Supplementary material for: Topological diversity of chromatin fibers: Interplay between nucleosome repeat length, DNA linking number and the level of transcription
Source: PubMed Central journal article supplement (PMC5271602; doi:10.3934/biophy.2015.4.613), 2015-11-03
Supplement: NIHMS809802-supplement-01.pdf [file NIHMS809802-supplement-01.pdf]

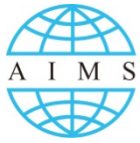

---

*Research article*

## **Topological diversity of chromatin fibers: Interplay between nucleosome repeat length, DNA linking number and the level of transcription**

**Davood Norouzi<sup>1</sup>, Ataur Katebi<sup>1</sup>, Feng Cui<sup>2</sup>, and Victor B. Zhurkin<sup>1,\*</sup>**

<sup>1</sup> Laboratory of Cell Biology, National Cancer Institute, NIH Bethesda, MD 20892, USA

<sup>2</sup> Thomas H. Gosnell School of Life Sciences, Rochester Institute of Technology, 85 Lomb Memorial Drive, Rochester, NY 14623, USA

\* **Correspondence:** Email: zhurkin@nih.gov.

### **Supplementary**

For  $L = 20$  bp, our structure has the inclination angle  $\rho = -45^\circ$  and rise = 27 Å. The “direct” model by Schalch et al. [7] is based on the X-ray tetranucleosome structure; it has inclination about  $-50^\circ/-40^\circ$  and low rise = 17 Å. Note, however, that this model has “steric overlaps” [7]; the authors suggest that these overlaps can be relieved by increasing the separation of tetranucleosomes. On the other hand, using the EM images for  $L = 20$  bp [9,16], one can estimate the rise to be  $\sim 25$  Å, which is close to 27 Å in our energetically optimal fiber (**A**).

For  $L = 30$  bp, Song et al. [8] built the high-resolution model based on the Cryo-EM data, with the inclination angle  $\rho \approx -60^\circ$  and rise = 24 Å (**E**). Our optimal structure is very close to this model:  $\rho = -60^\circ$  and rise = 25 Å (**B**).

For  $L = 40$  bp, the Cryo-EM-based model has  $\rho \approx -60^\circ$  and rise = 22.5 Å, compared to  $\rho = -70^\circ$  and rise = 20 Å in our optimal structure (**C**). Note that in both the theoretical (**B**, **C**) and the Cryo-EM-based models (**E**, **F**) the linker increase from  $L = 30$  to 40 bp is accompanied by a decrease in superhelical rise and increase in the diameter of fibers.

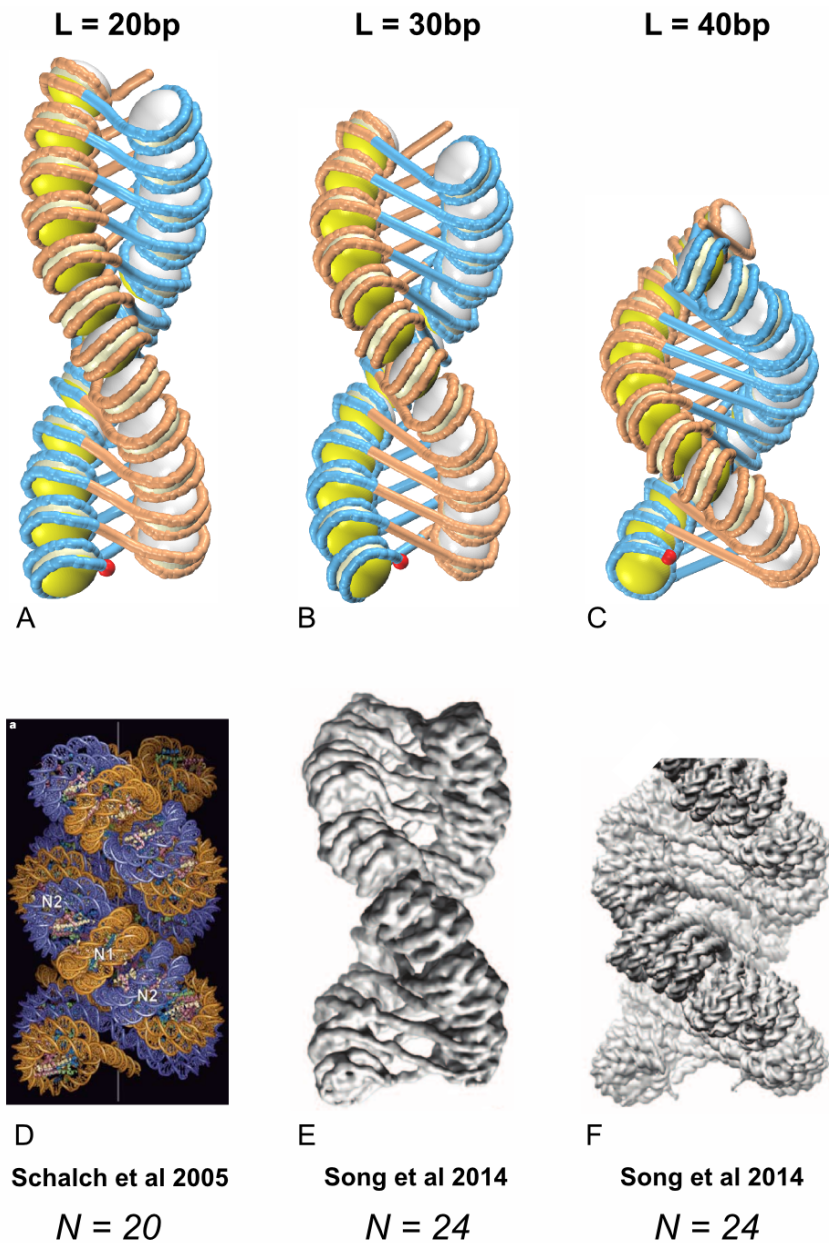

**Figure S1. Comparison of the energetically optimal fibers with the experiment-based models.** The computed structures for  $L=20, 30, 40$  bp (A, B, C) are the same as shown in Figure 3. In each case, the number of nucleosomes,  $N$ , is 24. (D–F) The published experiment-based models are shown for comparison, with the  $N$  values given below.

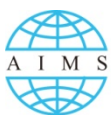

AIMS Press

© 2015 Victor B. Zhurkin, et al., licensee AIMS Press. This is an open access article distributed under the terms of the Creative Commons Attribution License (<http://creativecommons.org/licenses/by/4.0>)
